# Supplementary material
Source: PubMed Central journal article supplement (PMC1995713)

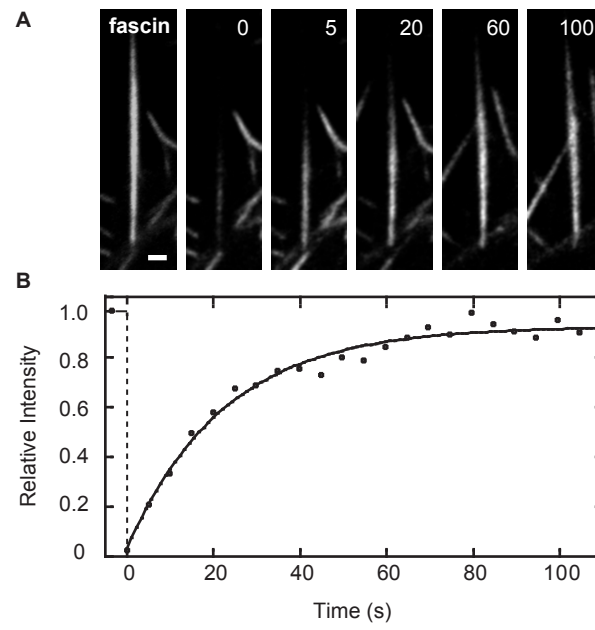

Aratyn, Schaus, and Borisy, Supplemental Figure 1

Supplement: E07-04-0346_1.pdf [file E07-04-0346_1.pdf]

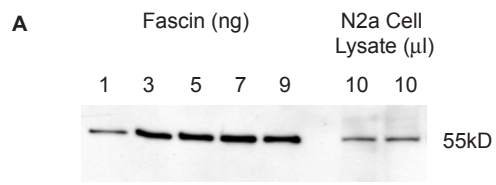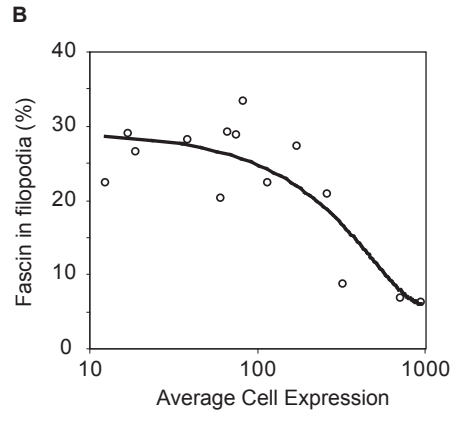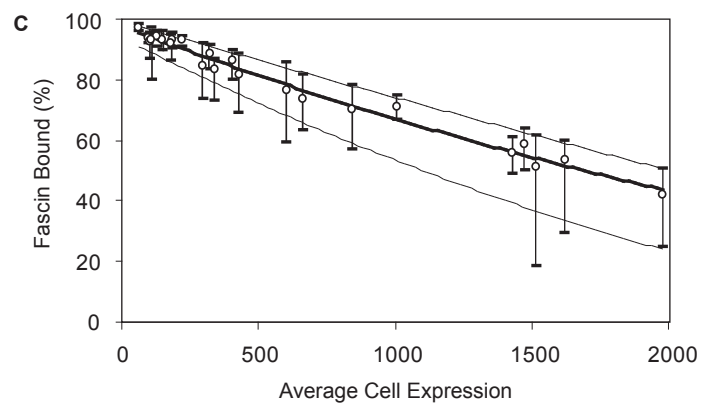

Aratyn, Schaus, and Borisy, Supplemental Figure 2

Supplement: E07-04-0346_2.pdf [file E07-04-0346_2.pdf]
